# Supplementary material for: Transformation optofluidics for large-angle light bending and tuning
Source: Royal Society of Chemistry journal article supplement (doi:10.1039/c2lc40442g), 2012-01-01
Supplement: c2lc40442g.pdf [file c2lc40442g.pdf]

## Electronic Supplementary Information

### **Transformation optofluidics for large angle light bending and tuning**

Y. Yang<sup>1</sup>, L. K. Chin<sup>1</sup>, J. M. Tsai<sup>2</sup>, D. P. Tsai<sup>3</sup>, N. Zheludev<sup>4</sup> and A. Q. Liu<sup>1†</sup>

<sup>1</sup>*School of Electrical and Electronic Engineering, Nanyang Technological University, Singapore 639798*

<sup>2</sup>*Institute of Microelectronics, Agency of Science, Technology and Research (A\*STAR), Singapore 117685*

<sup>3</sup>*Department of Physics, National Taiwan University, Taipei 10617, Taiwan*

<sup>4</sup>*Optoelectronics Research Centre, University of Southampton, United Kingdom*

(<sup>†</sup> Tel: +65 6790-4336; Fax: +65 6793-3318; Email: [eaqliu@ntu.edu.sg](mailto:eaqliu@ntu.edu.sg))

### **Contents**

- (1) Comparisons of transformation optofluidic waveguide and optofluidic splitter
- (2) Optical micrograph of the demonstration of light splitting in the optofluidic splitter

*Comparisons of transformation optofluidic waveguide and optofluidic splitter*

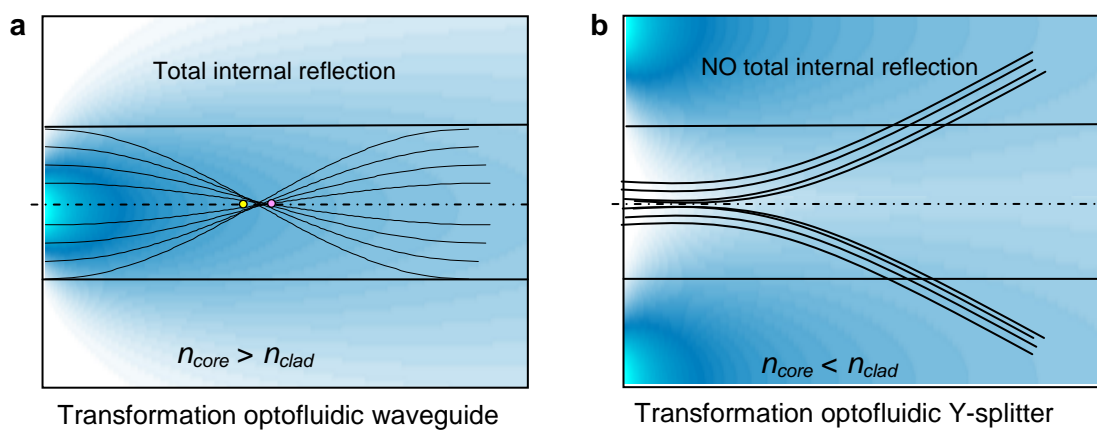

**Fig. S1** Theoretical explanation of the differences between (a) transformation optofluidic waveguide and (b) transformation optofluidic splitter.

*Optical micrograph of the demonstration of light splitting in the optofluidic splitter*

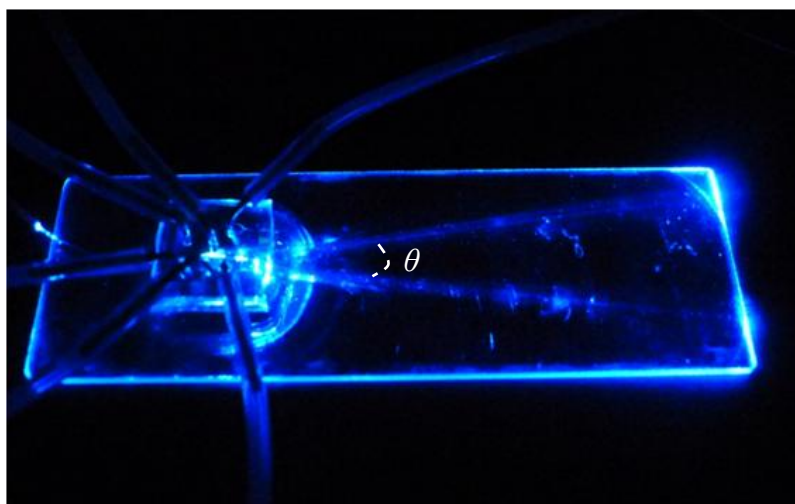

**Fig. S2** Transformation optofluidic splitter with large split angle.
